# Supplementary material for: Origin of light manipulation in nano-honeycomb structured organic light-emitting diodes
Source: Royal Society of Chemistry journal article supplement (doi:10.1039/c4tc02596b), 2015-01-01
Supplement: c4tc02596b1.pdf [file c4tc02596b1.pdf]

## Supporting Information

### Origin of Light Manipulating in Nano-honeycomb Structured Organic Light-emitting Diodes

Xiao-Bo Shi, Min Qian, Dong-Ying Zhou, Zhao-Kui Wang\*, and Liang-Sheng Liao\*

Institute of Functional Nano & Soft Materials (FUNSOM), Soochow University, Suzhou, Jiangsu 215123, China

Email: zkwang@suda.edu.cn; lsiao@suda.edu.cn.

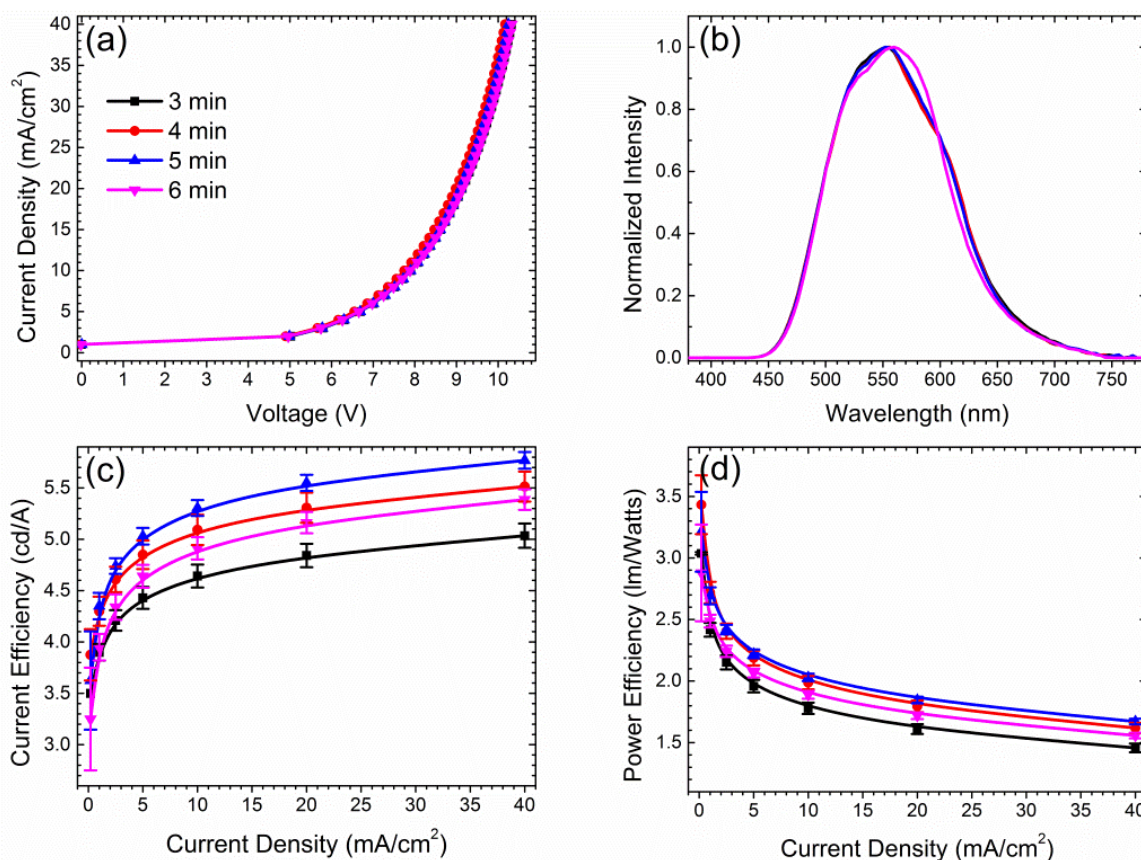

**Figure S1.** The average performance of OLED devices based on Alq<sub>3</sub> as emitters. The thickness of MoO<sub>x</sub> layer is 30 nm and the O<sub>2</sub> plasma etching time varies from 3 to 6 min. (a) Current density-voltage curves; (b) EL spectra; (c) Current efficiency versus current density curves; (d) Power efficiency versus current density curves.

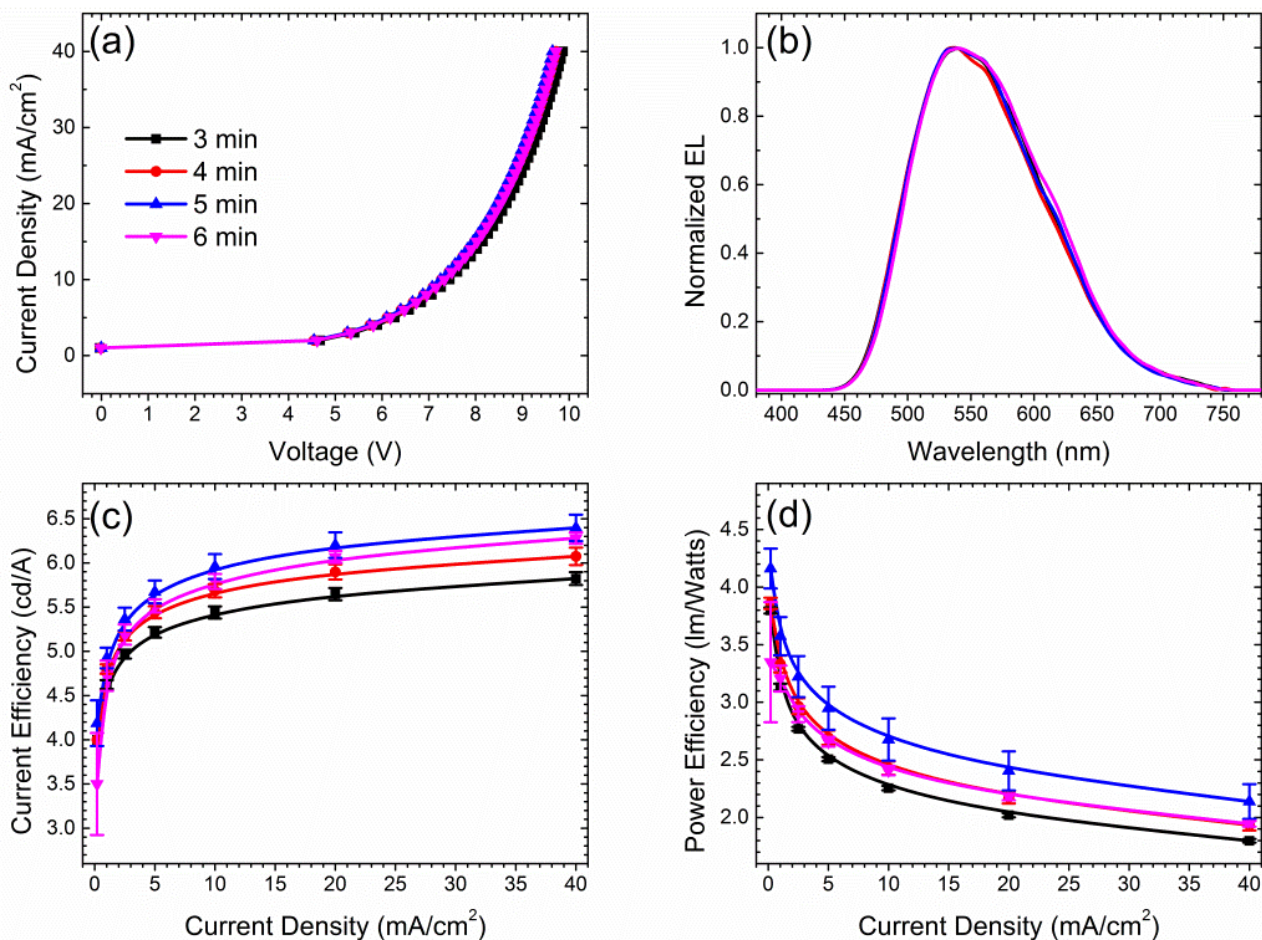

**Figure S2.** The average performance of OLED devices based on Alq<sub>3</sub> as emitters. The thickness of MoO<sub>x</sub> layer is **50 nm** and the O<sub>2</sub> plasma etching time varies from 3 to 6 min. (a) Current density-voltage curves; (b) EL spectra; (c) Current efficiency verse current density curves; (d) Power efficiency verse current density curves.

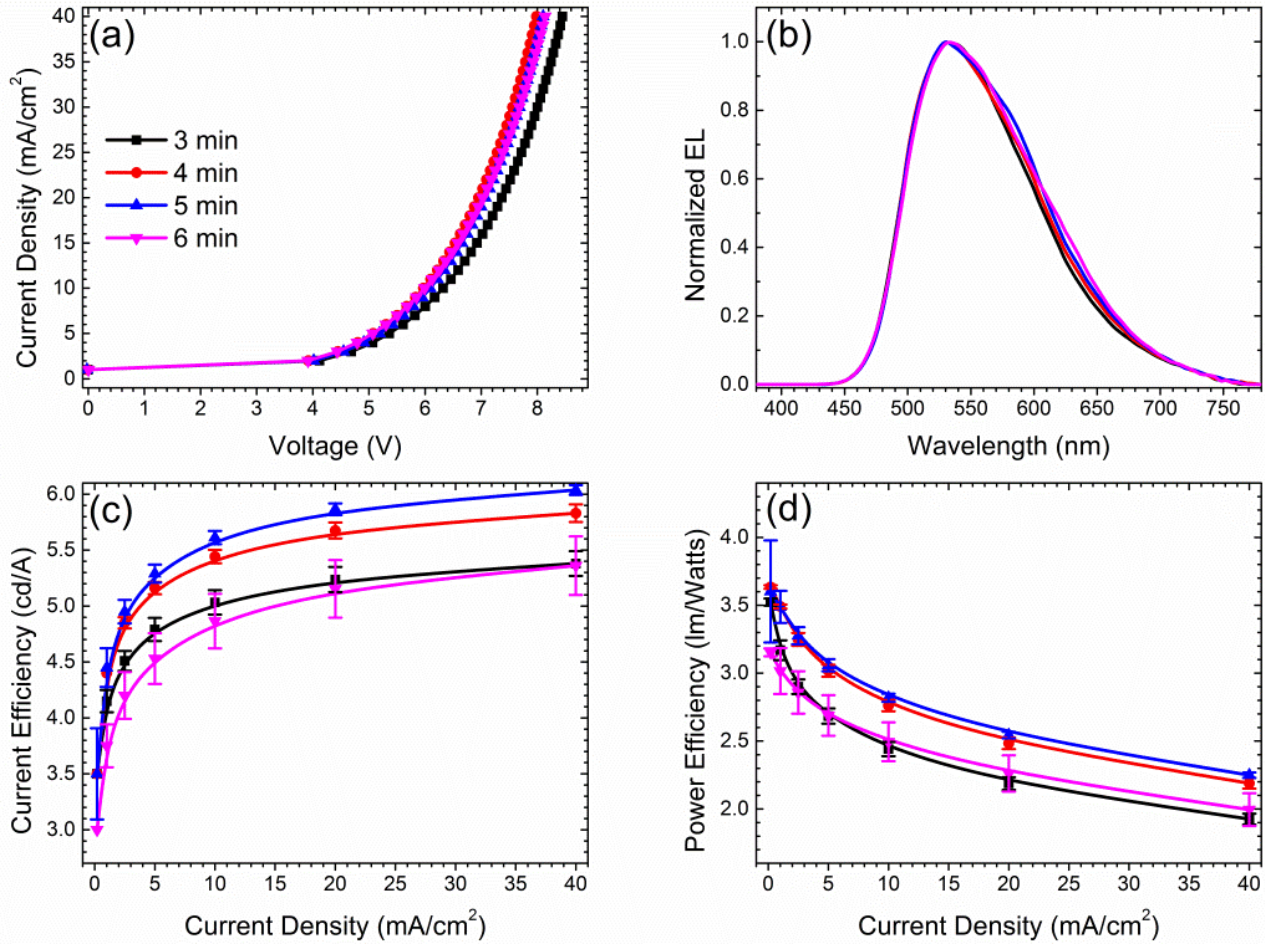

**Figure S3.** The average performance of OLED devices based on Alq<sub>3</sub> as emitters. The thickness of MoO<sub>x</sub> layer is **70 nm** and the O<sub>2</sub> plasma etching time varies from 3 to 6 min. (a) Current density-voltage curves; (b) EL spectra; (c) Current efficiency verse current density curves; (d) Power efficiency verse current density curves.

Figures S1-3 depict the average performance of honeycomb structure OLED devices based on Alq<sub>3</sub> as emitters. The thicknesses of MoO<sub>x</sub> layer are 30, 50, and 70 nm, while the O<sub>2</sub> plasma etching time varies from 3 to 6 min. An optimized performance is achieved when the thickness of MoO<sub>x</sub> layer is 50 nm and the MCC pattern of polystyrene spheres is etched for about 5 min, which corresponds to the best diffraction.
